# Supplementary material for: Genome-wide analysis of fitness-factors in uropathogenic Escherichia coli during growth in laboratory media and during urinary tract infections
Source: PubMed Central journal article supplement (PMC8767336; doi:10.1099/mgen.0.000719), 2021-12-20
Supplement: mgen-7-0719-s001.pdf [file mgen-7-0719-s001.pdf]

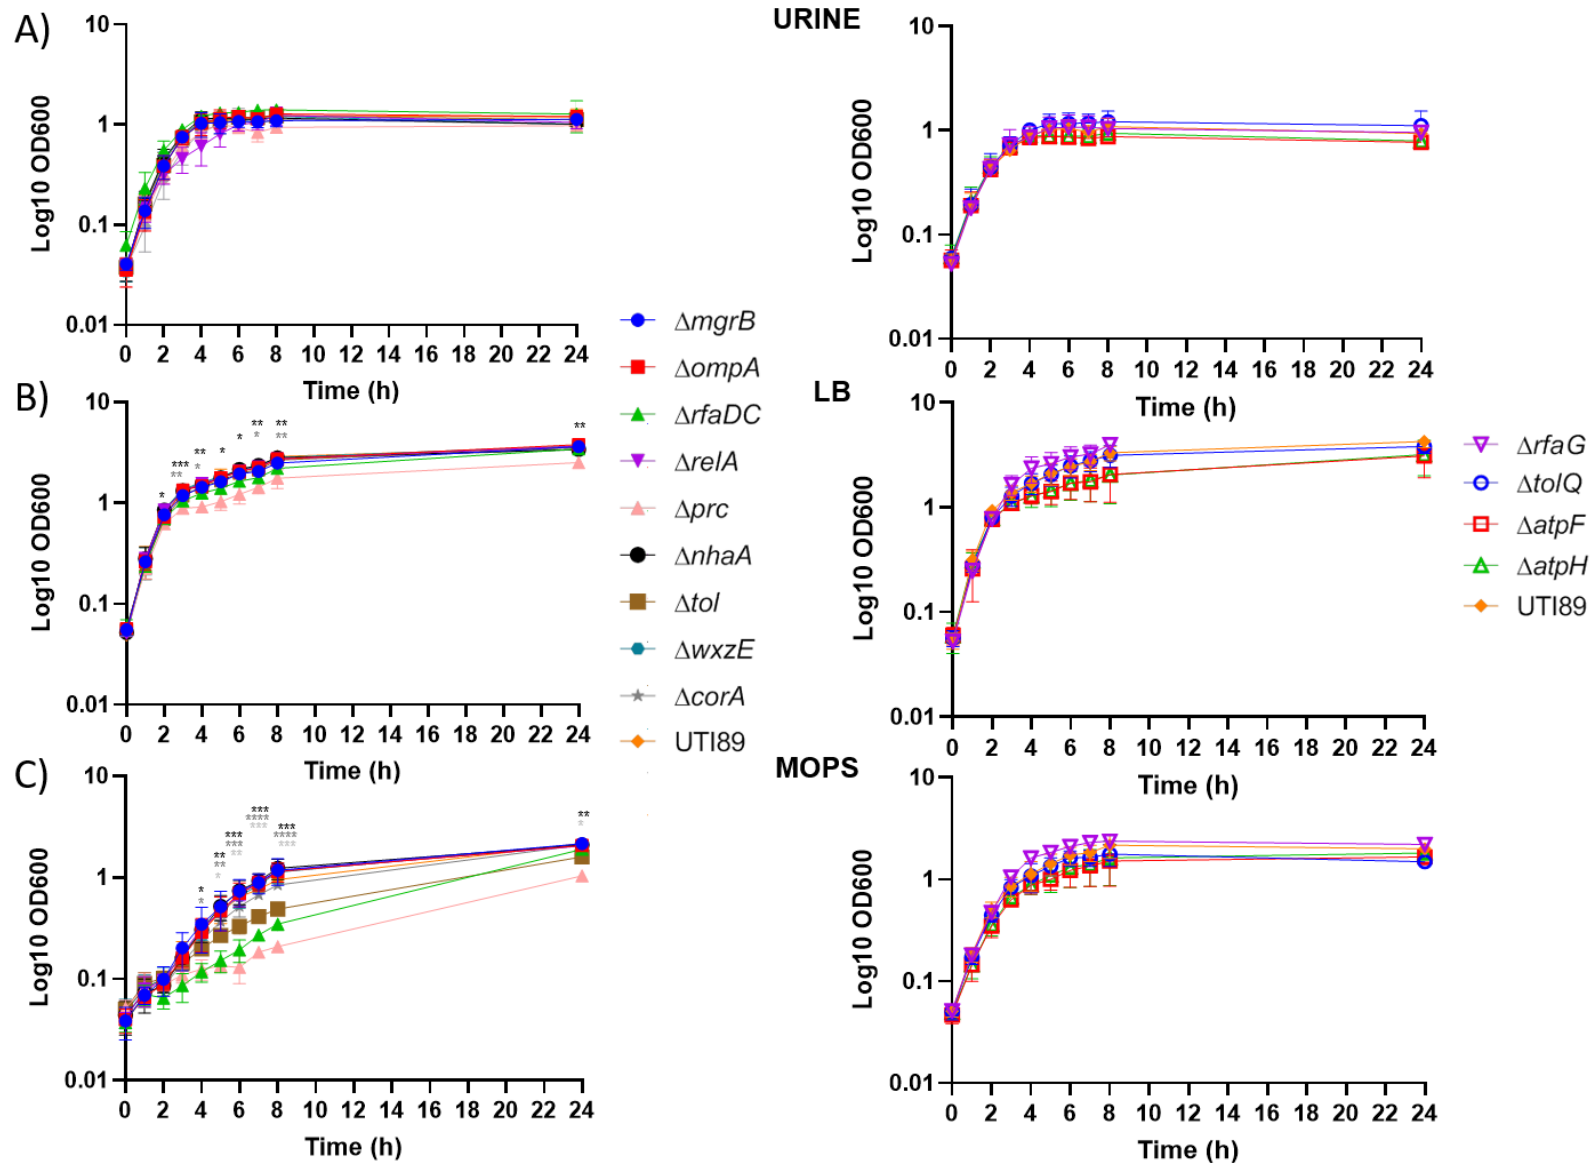

**Fig S1.** Growth curves obtained for *E. coli* UTI89 and its mutant derivatives in urine (A), LB (B) and EZ-MOPS (C). The data shown are means  $\pm$  standard deviations of at least three biological replicates. Statistical significance (\*\*\*\* $p < 0.0001$ ; \*\*\* $p < 0.001$ ; \*\* $p < 0.01$ ; \* $p < 0.05$ ) was determined by one-sample t-test or ANOVA and Sidak's post-test. Black and dark grey asterisks show significant differences between *E. coli* UTI89 and the mutants  $\Delta prc$  and  $\Delta rfaDC$  in LB and EZ-MOPS. Light grey asterisks show significant differences between *E. coli* UTI89 and the mutant  $\Delta tol$  in EZ-MOPS

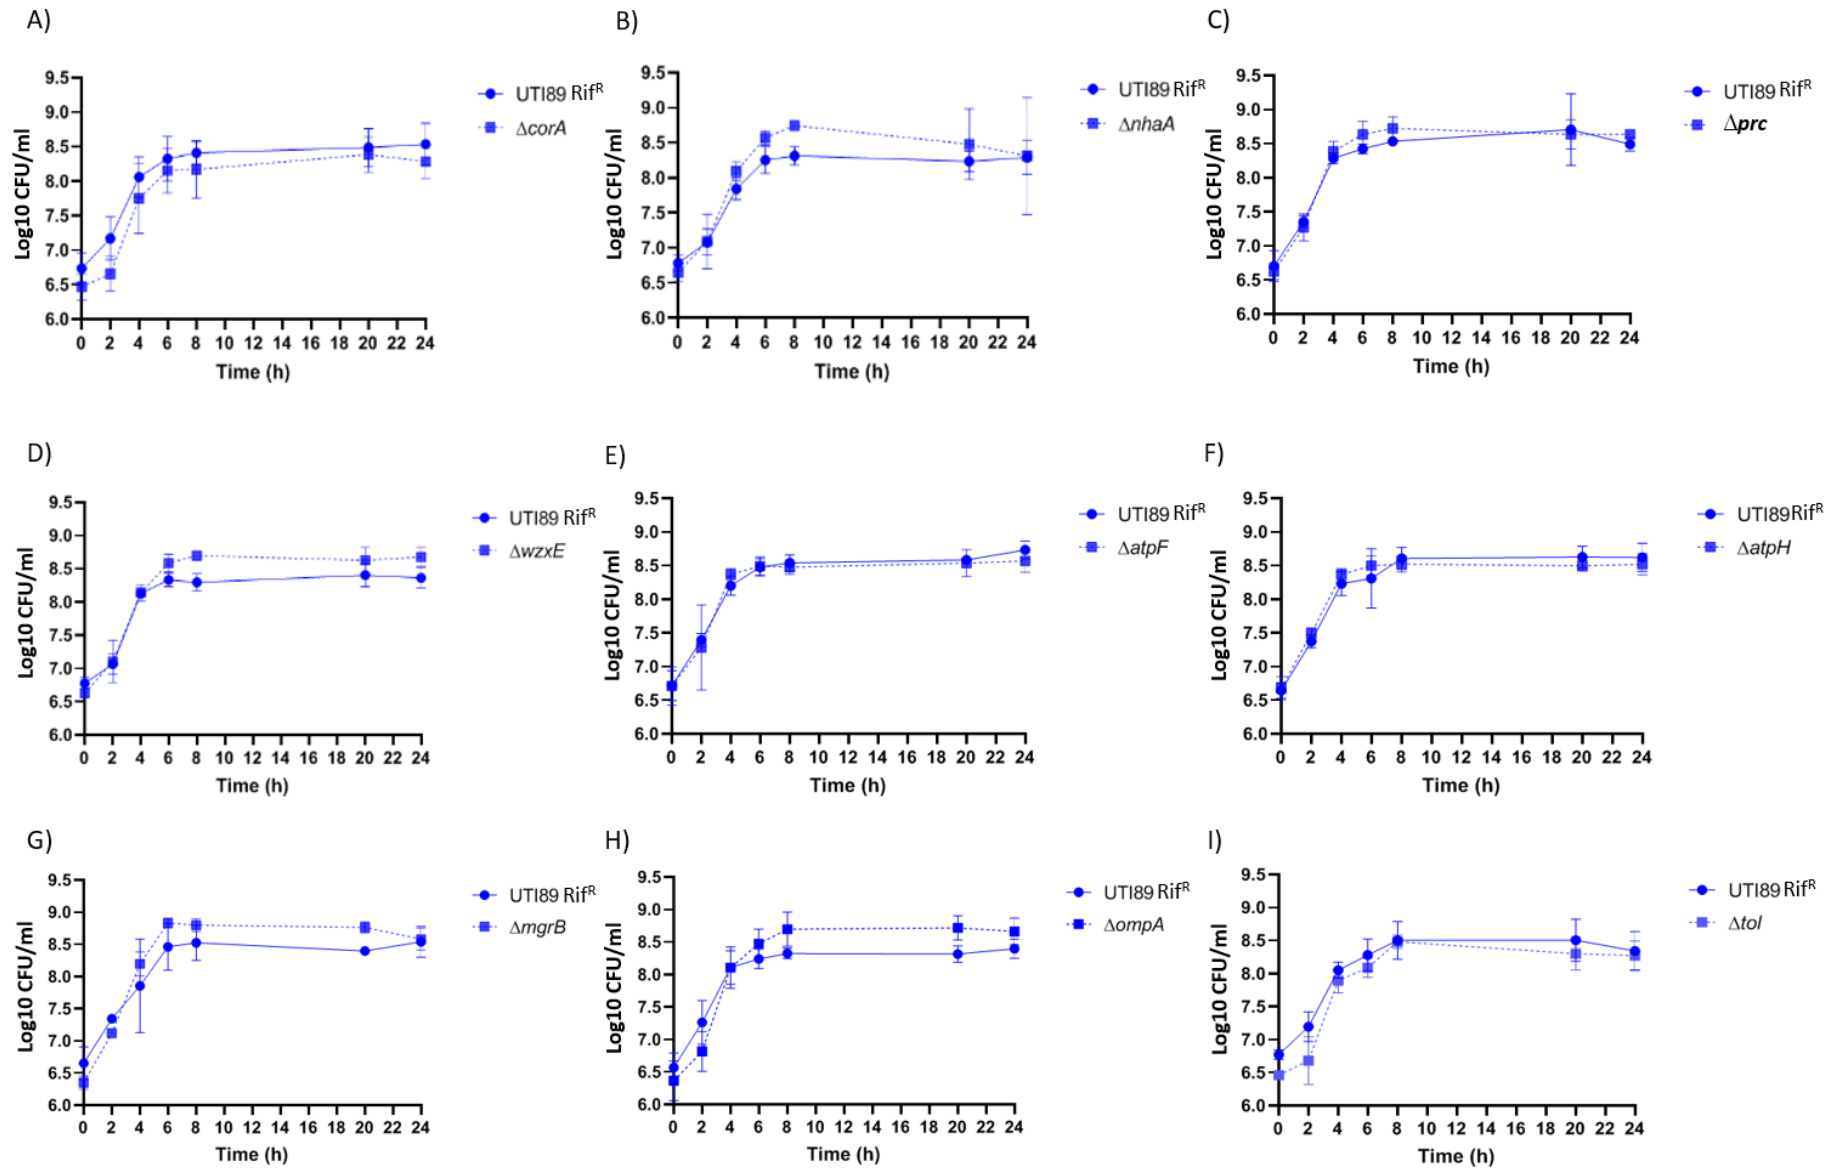

**Fig S2.** Competition assays of the E. coli UTI89 rifampicin resistant strain (UTI89 Rif<sup>R</sup>) and the mutants  $\Delta corA$  (A),  $\Delta nhaA$  (B),  $\Delta prc$  (C),  $\Delta wzxE$  (D),  $\Delta atpF$  (E),  $\Delta atpH$  (F),  $\Delta mgrB$  (G),  $\Delta ompA$  (H),  $\Delta tol$  (I), in human urine. The data shown are means  $\pm$  standard deviations of at least three biological replicates. No statistical significance was observed at any time point between each mutant and UTI89 Rif<sup>R</sup>.

**Table S1.** UTI89 output libraries and samples obtained in each mouse experiment.

| <b>Output library</b> | <b>Sample</b>                                                   | <b>Cfu/sample</b> | <b>Experiment</b>                  |
|-----------------------|-----------------------------------------------------------------|-------------------|------------------------------------|
| UTI89_U               | Mouse U                                                         | $3.5 \times 10^4$ | N= 11 mice                         |
| <b>UTI89_V</b>        | Mouse V                                                         | $1.2 \times 10^5$ | 6 h infection                      |
| <b>UTI89_W</b>        | Mouse W                                                         | $1.0 \times 10^6$ | 5% Glucose 16 h prior to infection |
| UTI89_X               | 4 mice (4 bladders)                                             | $3.3 \times 10^5$ |                                    |
| UTI89_Y               | 4 mice (4 bladders)                                             | $6.9 \times 10^4$ |                                    |
| <b>UTI89_Z</b>        | Mouse Z. One ml of each of the 5 samples (U to Y) (all 11 mice) | $8.1 \times 10^6$ |                                    |

Libraries analyzed by TraDIS are highlighted in bold (see Table 2).

**Table S2.** Primers used for TraDIS.

| <b>Primers<sup>1</sup></b> | <b>Sequence (5'-3')</b>                                                | <b>Reference</b> |
|----------------------------|------------------------------------------------------------------------|------------------|
| SplA5-Top                  | G*AGATCGGTCTCGGCATTCTGCTGAACCGCTCTCCGATC*T                             | [15]             |
| SplA5-Bottom               | /5PHOS/G*ATCGGAAGAGCGGTTTCAGCAGGTTTTTTTTTTTCAAAAAA*A                   | [15]             |
| <b>Primers<sup>2</sup></b> | <b>Sequence (5'-3')</b>                                                |                  |
| SplAP5.1                   | C*AAGCAGAAGACGGCATAACGATGAGATCGGTCTCGGCATTC*C                          | [15]             |
| SplAP5.2                   | C*AAGCAGAAGACGGCATAACATCGGAGATCGGTCTCGGCATTC*C                         | [15]             |
| SplAP5.3                   | C*AAGCAGAAGACGGCATAACGATATGCCTAAGAGATCGGTCTCGGCATTC*C                  | [15]             |
| SplAP5.4                   | C*AAGCAGAAGACGGCATAACGATAGTGGTCAGAGATCGGTCTCGGCATTC*C                  | [15]             |
| SplAP5.5                   | C*AAGCAGAAGACGGCATAACGATACACTGTGAGATCGGTCTCGGCATTC*C                   | [15]             |
| SplAP5.6                   | C*AAGCAGAAGACGGCATAACGATACATTGGCGAGATCGGTCTCGGCATTC*C                  | [15]             |
| SplAP5.7                   | C*AAGCAGAAGACGGCATAACGATCAGATCTGGAGATCGGTCTCGGCATTC*C                  | [15]             |
| SplAP5.8                   | C*AAGCAGAAGACGGCATAACGATCATCAAGTGGAGATCGGTCTCGGCATTC*C                 | [15]             |
| SplAP5.9                   | C*AAGCAGAAGACGGCATAACGATCGCTGATCGAGATCGGTCTCGGCATTC*C                  | [15]             |
| SplAP5.10                  | C*AAGCAGAAGACGGCATAACGATACAAGCTAGAGATCGGTCTCGGCATTC*C                  | [15]             |
| SplAP5.11                  | C*AAGCAGAAGACGGCATAACGATCTGTAGCCGAGATCGGTCTCGGCATTC*C                  | [15]             |
| SplAP5.12                  | C*AAGCAGAAGACGGCATAACGATAGTACAAGGAGATCGGTCTCGGCATTC*C                  | [15]             |
| SplAP5.13                  | C*AAGCAGAAGACGGCATAACGATAACAACCAGAGATCGGTCTCGGCATTC*C                  | [15]             |
| Tn-PCR-final1              | AATGATACGGCGACCACCGAGATCTACACCTGATCTAGAGTCGACCTGCAGGCA<br>TGCAAGCTTCAG | [15]             |
| <b>Primer<sup>3</sup></b>  | <b>Sequence (5'-3')</b>                                                |                  |
| qPCR2.1 (P5)               | AATGATACGGCGACCACCGAG                                                  | [15]             |
| qPCR 2.2 (P7)              | CAAGCAGAAGACGGCATAACGA                                                 | [15]             |
| Tn-seq-primer <sup>5</sup> | AGGCATGCAAGCTTCAGGGTTGAGATGTGTA                                        | [70]             |
| <b>Primer<sup>4</sup></b>  | <b>Sequence (5'-3')</b>                                                |                  |
| iPCRtagSeq                 | AAGAGCGGTTTCAGCAGGAATGCCGAGACCGATCTC                                   | [15]             |
| Illumina Read 1            | CGGTCTCGGCATTCTGCTGAACCGCTCTTCCGATCT                                   | [15]             |
| Tn-seq-primer <sup>5</sup> | AGGCATGCAAGCTTCAGGGTTGAGATGTGTA                                        | [72]             |

<sup>1</sup>Primers used for adapter ligation

<sup>2</sup>Indexed adapter-specific primers (SplA5.x) and transposon-specific primer used for PCR enrichment

<sup>3</sup>Primers used for qPCR TraDIS libraries quantification

<sup>4</sup>Primers used for MiSeq Illumina Sequencing

<sup>5</sup>This primer yields specific sequencing of the Tn-insertion sites on the Illumina MiSeq platform while allowing for multiple sample indexing. This primer contained (5'-3') the P5 sequence (33 bp) to bind to MiSeq flowcells, and the Tn-specific sequence (33 bp) designed to amplify the last 12 bp of the transposon and its adjacent genomic sequence

\* Indicates a phosphorothioate group

**Table S3.** Primers used for the construction and verification of mutants.

| Gene/region        | Primer <sup>1</sup>      | Sequence (5'-3')                                                                                    |
|--------------------|--------------------------|-----------------------------------------------------------------------------------------------------|
| <i>corA</i>        | <i>corA</i> -KO-F        | TTCTGTGTGCCACCGAACTGTCCGATATTTTAAGCATTGGGAGTCCCGGTC<br>ATGCTGAGCGCATTTCAGTGTAGGCTGGAGCTGCTTCG       |
|                    | <i>corA</i> -KO-R        | ACAATTTTCAGCAATAAGCCGGATAAAGAACAATCTTTACCCGGCATTATAT<br>TACAACCAGTTCTTCCGCATATGAATATCCTCCTTAGTTCC   |
| <i>UTI89_C1262</i> | <i>UTI89_C1262</i> -KO-F | AGGCTGCGTGATAGAATACGCCGCTTGAAGTTCAATGTCGTGAGTGATCC<br>AATGTCTGAAACCGCAAAGTGTAGGCTGGAGCTGCTTCG       |
|                    | <i>UTI89_C1262</i> -KO-R | TAGTAATTTCTTGGCCAGTTCAGTCTTCTTGTTTAAGTAAAGATAATAAT<br>CAGACCGGCAGCGGCAGCATATGAATATCCTCCTTAGTTCC     |
| <i>ybeY</i>        | <i>ybeY</i> -KO-F        | AACGTAAGCGGCGTGGCAGCAGAACGCAAGCGCGAAGAACAGGAACAA<br>AAATGAGTCAGGTGATCCTCGTGTAGGCTGGAGCTGCTTCG       |
|                    | <i>ybeY</i> -KO-R        | CCGTCGTTAATCACCAACGGCGGGGACGTCTGCCAGTCAAATGCCTGGCAA<br>ATTATTCTTCTCGGCAATCATATGAATATCCTCCTTAGTTCC   |
| <i>recB</i>        | <i>recB</i> -KO-F        | TGGGAGAACGTCAGCGCTTGCAGCAAACAATGCCCTGATGAGTGAAAAG<br>AATGAGTGATGTCGCCGAGGTGTAGGCTGGAGCTGCTTCG       |
|                    | <i>recB</i> -KO-R        | GGGCGTAGCTGTTTGTCTCCACAGCTTCCAGTAATTGCTTTTGCAATTTCA<br>TTACGCCCTCCTCCAGGGTCATATGAATATCCTCCTTAGTTCC  |
| <i>wzxE</i>        | <i>wzxE</i> -KO-F        | CCCGTCAATCAGCGTACGGTAATTGCGACCTTGTGAAGTACTTCTCCTGAT<br>ATGTCGTTGGCAAAGCGGTGTAGGCTGGAGCTGCTTCG       |
|                    | <i>wzxE</i> -KO-R        | ACGGTTCGTTATGGTGAGGGATATCCGATCCCAGTACGTGAATCAGTACA<br>GTCATGCCACCTACGCCACATATGAATATCCTCCTTAGTTCC    |
| <i>nhaA</i>        | <i>nhaA</i> -KO-F        | CGTGCGGGTAAAATCGTGAAAACGATCTATTCACCTGAAGAGAAATAAAAA<br>GTGAAACATCTGCATCGAGTGTAGGCTGGAGCTGCTTCG      |
|                    | <i>nhaA</i> -KO-R        | CCTGATAACAATGAAAAGGGAGCCGTTTATGGCTCCCAGTACATCGTCCT<br>GTCAAACGATGGACGTAACATATGAATATCCTCCTTAGTTCC    |
| <i>prc</i>         | <i>prc</i> -KO-F         | TTGATTGTGCGCGCAGAACACCTGGTGTCTGAAACGGAGGCCGGGCCAG<br>GCATGAACATGTTTTTAGGGTGTAGGCTGGAGCTGCTTCG       |
|                    | <i>prc</i> -KO-R         | GCATCTTGCCGCTGTTAAAAATCAGGCACAATTTCTTGTGCCCTGATTGATA<br>TTACTTGACGGGAGCGGGCATATGAATATCCTCCTTAGTTCC  |
| <i>tol</i>         | <i>tolQ</i> -KO-F        | TCAAAATGAAGCCTCGTGCCTTCCCAAGTCTATTGTGCGGGAGTTAAGCA<br>GTGACTGACATGAATATCGTGTAGGCTGGAGCTGCTTCG       |
|                    | <i>tolB</i> -KO-R        | CACTTTGTTGAGTTGCATTTCAATGATTCCTTTACTATTCAATTAATTATTATC<br>ACAGATACGGCGACCACATATGAATATCCTCCTTAGTTCC  |
| <i>tolQ</i>        | <i>tolQ</i> -KO-F        | TCAAAATGAAGCCTCGTGCCTTCCCAAGTCTATTGTGCGGGAGTTAAGCA<br>GTGACTGACATGAATATCGTGTAGGCTGGAGCTGCTTCG       |
|                    | <i>tolB</i> -KO-R        | CACTTTGTTGAGTTGCATTTCAATGATTCCTTTACTATTCAATTAATTATTATC<br>ACAGATACGGCGACCACATATGAATATCCTCCTTAGTTCC  |
| <i>relA</i>        | <i>relA</i> -KO-F        | AATAGTTACGATTTGCCATTTCCGGCAGGTCTGGTCCCTAAAGGAGAGGAC<br>GATGGTTGCGGTAAGAAGTGTGTAGGCTGGAGCTGCTTCG     |
|                    | <i>relA</i> -KO-R        | ATGTAGATACAGTATATCAATCTACATTGTAGATACGAGCAAGTTTCGGC<br>CTAACTCCCGTGCAACCGCATATGAATATCCTCCTTAGTTCC    |
| <i>glnA</i>        | <i>glnA</i> -KO-F        | ATTGCAGATTTGTTACCACGACGACAATGACCAATCCAGGAGAGTTAAAGT<br>ATGTCGCTGAACACGTAGTGTAGGCTGGAGCTGCTTCG       |
|                    | <i>glnA</i> -KO-R        | CCACGGCAACTAAATCCCGGCTTGTGCGCCGGGTAGTACAACCTTCAACT<br>ATTAGACGCTGTAGTACAGCATATGAATATCCTCCTTAGTTCC   |
| <i>ompA</i>        | <i>ompA</i> -KO-F        | ATCTCGTTGGAGATATTCATGGCGTATTTGGATGATAACGAGGCGCAAAAA<br>ATGAAAAAGACAGCTATCGTGTAGGCTGGAGCTGCTTCG      |
|                    | <i>ompA</i> -KO-R        | AGGCGAAAAAAAACCCCGCAGCTGCGGGTTTTTCTACCAGACGAGAACT<br>TAAGCCTGCGGCTGAGTTACATATGAATATCCTCCTTAGTTCC    |
| <i>mgrB</i>        | <i>mgrB</i> -KO-F        | TAACTAACGCATGCTAGTTTAAATGACATAAGGTAGGTGAAACGGAGATTGGA<br>GTGAAAAAGTTTCGATGGGTGTAGGCTGGAGCTGCTTCG    |
|                    | <i>mgrB</i> -KO-R        | GCTATTCTACCACTGCTGGAGAGGAAGAAAATCTAGTGCTGAAAAATGATA<br>TCACCACGGGATAAACTGGTCATATGAATATCCTCCTTAGTTCC |
| <i>eda</i>         | <i>eda</i> -KO-F         | CTGTATCACTTTTTAAGACGACAAATTTGTAATCAGGCGAGAGAAAACCTCTG<br>ATGAAAAACTGGAAAACAGTGTAGGCTGGAGCTGCTTCG    |

|                    |                           |                                                                                                   |
|--------------------|---------------------------|---------------------------------------------------------------------------------------------------|
|                    | eda-KO-R                  | CGGCCAAAAACGCTACAAAAATGCCCGATCCTCGATCGGGCATTGACTT<br>TTACAGCTTAGCGCCTTCCATATGAATATCCTCCTTAGTTCC   |
| <i>rfaDC</i>       | rfaD-KO-F                 | AAGTATTCGTGTCTGAGATTGTCTCTGACTCCATAAATCGAAGTTACAGTTA<br>TGATCATCGTTACCGCGTGTAGGCTGGAGCTGCTTCG     |
|                    | rfaC-KO-R                 | ATCAGCAAGGAAGCTGATTTTTATTTCAAATATCTATTAAGAGTTGTAATTT<br>AAATCATGGCAGCTTTCATATGAATATCCTCCTTAGTTCC  |
| <i>rfaG</i>        | rfaG-KO-F                 | TCATTGCTGCTGTCGATAAACTACTGCCCTCCTCCACGACAGGTACGTGCTT<br>ATGATCGTTGCTTTTTGTGTGTAGGCTGGAGCTGCTTCG   |
|                    | rfaG-KO-R                 | TTCCTCAAAGGATCTTTACCGCGCCATAACGTGGCAAACGGCTCTTTAAGT<br>TCAACCATCCAGACCACCCATATGAATATCCTCCTTAGTTCC |
| <i>tusA</i>        | tusA-KO-F                 | ACGGACTCACAGGGCGTAACTAGCGCCGTTTTTTATGTGATGAGAAGAAA<br>ATGACCGATCTTTTTCCGTGTAGGCTGGAGCTGCTTCG      |
|                    | tusA-KO-R                 | GGAGAGGGTTAGGGTGAGGGCAAAGGCGGCATCGAAGCCAATCTTCCCC<br>CATCAACCGCTTTACGAATCATATGAATATCCTCCTTAGTTCC  |
| <i>atpH</i>        | atpH-KO-F                 | ACAGCGACATCGTGGATAAACTTGTGCTGAACTGTAAGGAGGGAGGGGCT<br>GATGTCTGAATTTATTACGGTGTAGGCTGGAGCTGCTTC     |
|                    | atpH-KO-R                 | GCTTGATCAGTTTCGCTGATTTCCGGTGAATTCAGTTGCATGCTCCAGTCCCC<br>TTAAGACTGCAAGACGTCCATATGAATATCCTCCTTA    |
| <i>atpF</i>        | atpF-KO-F                 | CTTTATTTAAAGAGCAATATCAGAACGTTAACTAAATAGAGGCATTGTGCTG<br>TGAATCTAACGCAACAGTGTAGGCTGGAGCTGCTTC      |
|                    | atpF-KO-R                 | TTGGCGTAGGGCGAGCTACCGTAATAAATTCAGACATCAGCCCCTCCCTC<br>CTTACAGTTCAGCGACAAGCATATGAATATCCTCCTTA      |
| <i>ftsE</i>        | ftsE-KO-F                 | CGTTTAAGGCGGACGACTTTATAGAGGCACCTTTTTGCCCGAGAGGATTAACA<br>ATGATTCGCTTTGAACATGTGTAGGCTGGAGCTGCTTC   |
|                    | ftsE-KO-R                 | GAAGCGATCCAGACGCCCGCAAACGCGCAATATGATTGATTGCATCGCG<br>CTTATTCATGGCCACGCCCATATGAATATCCTCCTTA        |
| <i>ypdE</i>        | ypdE-KO-F                 | CAGAGGTGCTCTACGCCATGCCGAAAACAGTGTTGCTCACGGGAGAGGCAT<br>AATGGATTTATCGCTATTAGTGTAGGCTGGAGCTGCTTC    |
|                    | ypdE-KO-R                 | AAGGACAGAGAAATTGAATCGTTAACATAACCGCTCCGGGTTAATCAGGAG<br>ATCATCTGAAATCCGTCAGCATATGAATATCCTCCTTA     |
| <i>himD</i>        | himD-KO-F                 | TCAATGCAGCAACAGCAGCCGCTTAATTTGCCTTTAAGGAACCGGAGGAAT<br>CATGACCAAGTCAGAATTGGTGTAGGCTGGAGCTGCTTC    |
|                    | himD-KO-R                 | TGAAAAAAGCACCCGACAGGTGCTTTTTCTCGCTTCAAGTTTGTAGTAAAAAC<br>TTAACCGTAAATATTGGCCATATGAATATCCTCCTTA    |
| <i>cutA</i>        | cutA-KO-F                 | CGTTGTATAGTGACCTCTCTCTTGCCTTCCATCTGTTCTTGCGAGGTGTTT<br>ATGCTTGATGAAAAAAGTGTGTAGGCTGGAGCTGCTTC     |
|                    | cutA-KO-R                 | CCCGGCGCGTGAATAATCCGGCAAACGGAAGTGTGCAAAGTAGCAG<br>GATCAGCGTAAAGATGCGTTCATATGAATATCCTCCTTA         |
| <i>phnO</i>        | phnO-KO-F                 | CGCCAGTCGGTCGACACGCTGCTGACGCTGATTCATCAGAAGGAGAAAAC<br>CATGCCTGCTTGTGAACCTTGTGTAGGCTGGAGCTGCTTC    |
|                    | phnO-KO-R                 | CGGAACGCCCTGTGCGCCCGGGTCCCGGTGAGCGTGAGGGTCAGGCTC<br>ATGTTACAGCGCCTTGGTGAAGCCATATGAATATCCTCCTTA    |
| <i>tam</i>         | tam-KO-F                  | AATTTATCAGTTTTATCTACAATTGGGGTAACGCGCTGACGGGAGTAAAAAA<br>ATGTCTGACTGGAACCCCGTGTAGGCTGGAGCTGCTTC    |
|                    | tam-KO-R                  | AGAAATTCAGCGAAAATCTTCCCGATCGCCATTACCAGCTGACGTGATAA<br>TACTCCGTACGGCGGGCCATATGAATATCCTCCTTA        |
| <i>sufA</i>        | sufA-KO-F                 | ATTATCACTAACATGCTGTTATACGCTGAAAGCGATGAAGTGAGGTAAATCG<br>ATGGACATGCATTCAGGAGTGTAGGCTGGAGCTGCTTC    |
|                    | sufA-KO-R                 | GTCCAGGTTTTGACATCGTCAGTTGCTTCAGTATTACGAGACATAGTACCGC<br>CTATACCCCAAAGCTTTCATATGAATATCCTCCTTA      |
| <b>Gene/Region</b> | <b>Primer<sup>2</sup></b> | <b>Sequence (5'-3')</b>                                                                           |
| <i>corA</i>        | corA-check-F              | ATAGCCTTAGCGGTTGTCAG                                                                              |
|                    | corA-check-R              | GATAGAGCGAGTGTCAACC                                                                               |
| <i>UTI89_C1262</i> | UTI89_C1262-check-F       | ATCCGCTGGAGATGATTGGC                                                                              |
|                    | UTI89_C1262-check-R       | CTGACAAATACCGGCAAGGG                                                                              |

|              |              |                          |
|--------------|--------------|--------------------------|
| <i>ybeY</i>  | ybeY-check-F | TTAACGCCTATGAAGCCTGG     |
|              | ybeY-check-R | GCGTCGTATGGTTCTCATG      |
| <i>recB</i>  | recB-check-F | ACGGGAAAGCCGAATATGTG     |
|              | recB-check-R | GACGGCAGGATGTTTCATCTC    |
| <i>wzxE</i>  | wzxE-check-F | GCCTGCCGTTGTTCTACAAC     |
|              | wzxE-check-R | CCAGCGCGTCGTTGAAAAAC     |
| <i>nhaA</i>  | nhaA-check-F | TCTCGCTGATGGCGCAATTC     |
|              | nhaA-check-R | CCAACCACAGAACCTTCTTTG    |
| <i>prc</i>   | prc-check-F  | AATCACCAAAGACGGCGTCC     |
|              | prc-check-R  | CATCGTATGGGTTACGCGAC     |
| <i>tol</i>   | tol-check-F  | TCTGGTTGTTTGC GTTGACC    |
|              | tol-check-R  | AGGCAGAGCAATCATCAGCC     |
| <i>tolQ</i>  | tolQ-check-F | TTTTATGAAAGAGCACGCACAGA  |
|              | tolQ-check-R | CCAGACACTTCAACAATCACTGG  |
| <i>relA</i>  | relA-check-F | GATGGTACTTTTCTCGCGCG     |
|              | relA-check-R | AACCCTTTCCTCAAACCGCG     |
| <i>glnA</i>  | glnA-check-F | TGATAACGCCTTTTAGGGGC     |
|              | glnA-check-R | ATGCAGAGATGGGCTGAAAG     |
| <i>ompA</i>  | ompA-check-F | TTTTTCATATGCCTGACGGAGTT  |
|              | ompA-check-R | CGATCGATCTGGAATTTATCGTC  |
| <i>mgrB</i>  | mgrB-check-F | CATTCCGAAAAGCACGAATATC   |
|              | mgrB-check-R | AAGAAGAACCACCACCGATACAA  |
| <i>eda</i>   | eda-check-F  | ACATCATTCTGTGAATGGACAG   |
|              | eda-check-R  | TGATAATGTGCAGAATGCCGTAG  |
| <i>rfaDC</i> | rfaD-check-F | CAAAAGTTAATGACGTGGCTTCC  |
|              | rfaC-check-R | GTTATCAACGCGTGGTATTCCTG  |
| <i>rfaG</i>  | rfaG-check-F | GTTTGGTGCGACAGACCATATTT  |
|              | rfaG-check-R | TGCCACCCCATACATAGTATCAA  |
| <i>tusA</i>  | tusA-check-F | ACGATAACCAGAACAACGCCTTA  |
|              | tusA-check-R | GAGGCTATCAGTCTACGGTCCAA  |
| <i>atpH</i>  | atpH-check-F | AACGAGCACATAAGGACCTTGAC  |
|              | atpH-check-R | GGAGATCATTTCCACCCTGCATAC |
| <i>atpF</i>  | atpF-check-F | CTGGAGACTGTCATGGAAAACCT  |
|              | atpF-check-R | AAGACGACCATTTTCAGCCATTA  |
| <i>ftsE</i>  | ftsE-check-F | ATGAAGAACTCGACGTTGAAGC   |
|              | ftsE-check-R | ATTTGCGGTGACGGATAAATACTG |
| <i>ypdE</i>  | ypdE-check-F | ACCCGCTGTTTAACGTCTATCAA  |

|             |              |                          |
|-------------|--------------|--------------------------|
|             | ypdE-check-R | TTCAGGCTGCAACTGTCATTA    |
| <i>himD</i> | himD-check-F | TCGGGATTTTTATTCCGAAGTTT  |
|             | himD-check-R | GAGAGTCAGAAACGCAAGGGTTA  |
| <i>cutA</i> | cutA-check-F | ACCCGTATCGGTAAATTCGTCTT  |
|             | cutA-check-R | ACAGCCCTGGTAGGTGACAGTTA  |
| <i>phnO</i> | phnO-check-F | GTTTGTATTACGGTGTCCGGCATT |
|             | phnO-check-R | GTGATCCATATGGTAGTGCGTCA  |
| <i>tam</i>  | tam-check-F  | CATGTCATACGTCCACAGCAAAT  |
|             | tam-check-R  | ATCTGCATTACATGACGCCTTTT  |
| <i>sufA</i> | sufA-check-F | AAGAGCTAAGCCACTGTGAGTGC  |
|             | sufA-check-R | GTGATAGGCCTTGAGACGAAACT  |

<sup>1</sup>Primers used for construction of mutants

<sup>2</sup>Primers used for verification of mutants
